# Supplementary material for: Synthesis and Study of the Optical Properties of a Conjugated Polymer with Configurational Isomerism for Optoelectronics
Source: MDPI journal article supplement (doi:10.3390/ma16072908), 2023-04-06
Supplement: s1 [file s1]

# Synthesis and Study of the Optical Properties of a Conjugated Polymer with Configurational Isomerism for Optoelectronics

Oscar Javier Hernández-Ortiz <sup>1,2</sup>, Damaris Castro-Monter <sup>1</sup>, Ventura Rodríguez Lugo <sup>1,\*</sup>, Ivana Moggio <sup>3</sup>, Eduardo Arias <sup>3</sup>, María Isabel Reyes-Valderrama <sup>1</sup>, María Aurora Veloz-Rodríguez <sup>1</sup> and Rosa Angeles Vázquez-García <sup>1,\*</sup>

<sup>1</sup> Área Académica de Ciencias de la Tierra y Materiales, Universidad Autónoma del Estado de Hidalgo, Carretera Pachuca-Tulancingo Km. 4.5, Ciudad del Conocimiento, Mineral de la Reforma 42184, Hidalgo, Mexico

<sup>2</sup> Laboratorio de Química Supramolecular y Nanociencias de la Unidad Profesional Interdisciplinaria de Biotecnología del Instituto Politécnico Nacional, Av. Acueducto s/n Barrio la Laguna Ticomán, Ciudad de México 07340, Ciudad de México, Mexico

<sup>3</sup> Centro de Investigación en Química Aplicada, Enrique Reyna H. 140, San José de los Cerritos, Saltillo 25294, Coahuila, Mexico

\* Correspondence: venturar@uaeh.edu.mx (V.R.L.); rosavg@uaeh.edu.mx (R.A.V.-G.)

## Contents

1. GPC results
2. TD-DFT data
3. Additional voltammograms

## 1. GPC Results of PBQT

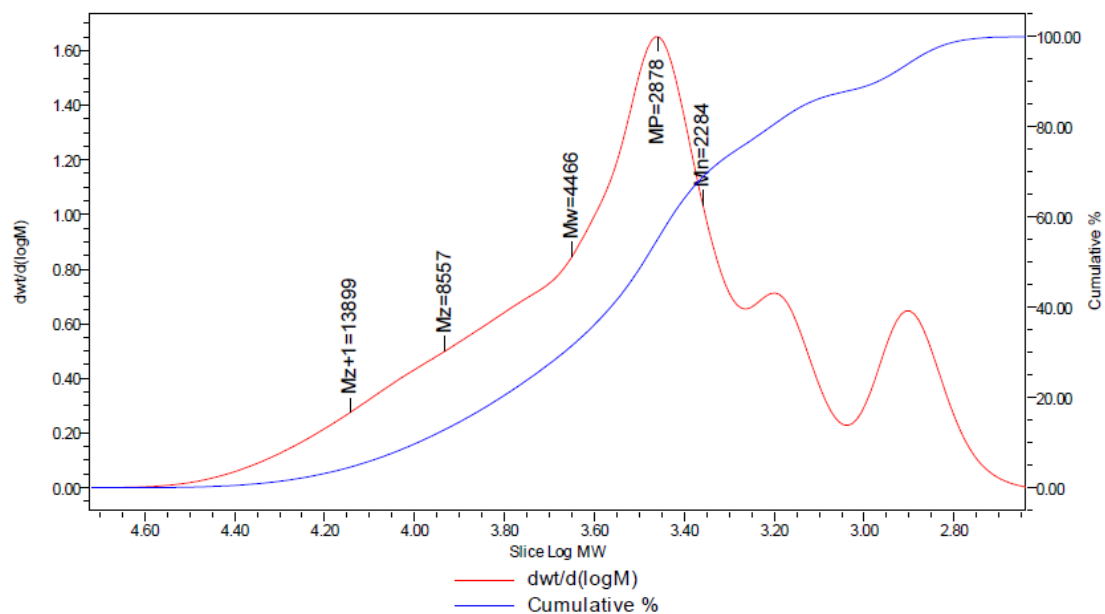

**Figure S1.** Gel permeation chromatography analysis of **PBQT** relative to polystyrene curves.

**Table S1.** GPC results

| Retention time<br>(min) | Mn<br>(Dalton) | Mw<br>(Dalton) | MP<br>(Dalton) | Polydispersity |
|-------------------------|----------------|----------------|----------------|----------------|
| 15.809                  | 2,284          | 4,466          | 2,878          | 1.96           |

## 2. TD-DFT data

**Table S2.** Electronic transitions obtained by TD-DFT BhandHLYP/6-31 G (d, p) of trimer **3** Trans

| $\lambda_{ab}$<br>(nm) | E(tr)<br>(eV) | OS<br>(f)     | MO/Character                                                                                                                                  |
|------------------------|---------------|---------------|-----------------------------------------------------------------------------------------------------------------------------------------------|
| 402.19                 | 3.0827        | <b>2.1225</b> | H-1→L+1 (0.04), H→L (0.92)                                                                                                                    |
| 322.92                 | 3.8395        | 0             | H-4→L (0.02), H-1→L (0.16), H-1→L+2 (0.05), H→L+1 (0.72)                                                                                      |
| 305.71                 | 4.0556        | <b>0.1116</b> | H-3→L (0.03), H-2→L (0.73), H-1→L+1 (0.06), H→L+2 (0.06)                                                                                      |
| 289.34                 | 4.285         | <b>0.1352</b> | H-5→L (0.06), H-4→L+1 (0.09), H-3→L (0.08), H-2→L (0.10), H-2→L+2 (0.04), H-1→L+1 (0.03), H-1→L+3 (0.11), H→L+2 (0.43)                        |
| 287.88                 | 4.3068        | 0             | H-4→L (0.06), H-4→L+2(0.03), H-3→L+1(0.10), H-2→L+1(0.03), H-1→L (0.57), H-1→L+2(0.03), H→L+1(0.09), H→L+3(0.04),                             |
| 276.33                 | 4.4868        | 0             | H-5→L+1(0.09), H-4→L (0.25), H-3→L+1(0.03), H-3→L+3(0.02), H-2→L+1(0.04), H-1→L (0.08), H-1→L+2(0.06), H-1→L+6(0.03), H→L+1(0.12) H→L+3(0.22) |
| 270.71                 | 4.58          | <b>0.4229</b> | H-4→L+1(0.12), H-3→L (0.47), H-3→L+2(0.04), H-1→L+1(0.19), H→L+2(0.07)                                                                        |
| 252.97                 | 4.9012        | <b>0.1054</b> | H-6→L+1(0.03), H-5→L (0.20), H-4→L+1(0.03), H-4→L+3(0.03), H-3→L+2(0.02), H-2→L+2(0.05), H-1→L+1(0.13), H→L (0.03), H→L+2(0.32) H→L+14(0.05)  |
| 251.69                 | 4.9262        | 0             | H-6→L (0.04), H-4→L (0.28), H-3→L+1 (0.12), H-2→L+1 (0.10), H-1→L (0.03), H-1→L+2 (0.12), H→L+3 (0.22),                                       |
| 240.99                 | 5.1448        | 0             | H-6→L (0.02), H-4→L (0.04), H-4→L+2(0.02), H-3→L+3(0.05), H-2→L+1(0.33), H-1→L (0.06), H-1→L+2(0.04), H-1→L+6(0.02), H→L+3(0.35)              |

**Table S3.** Electronic transitions obtained by TD-DFT BhandHLYP/6-31 G (d, p) of trimer **3** Cis

| $\lambda_{ab}$<br>(nm) | E(tr)<br>(eV) | OS<br>(f)     | MO/Character                                                                                                                                                         |
|------------------------|---------------|---------------|----------------------------------------------------------------------------------------------------------------------------------------------------------------------|
| 422.3                  | 2.9359        | <b>1.4219</b> | H-2→L+1 (0.03), H→L (0.94)                                                                                                                                           |
| 332.47                 | 3.7292        | <b>0.1162</b> | H-2→L+1 (0.03), H-1→L (0.87)                                                                                                                                         |
| 330.82                 | 3.7477        | 0             | H-2→L (0.08), H-2→L+2 (0.03), H→L+1 (0.83)                                                                                                                           |
| 295.25                 | 4.1993        | 0             | H-3→L+1 (0.05), H-2→L (0.71), H-1→L+1 (0.09), H→L+1 (0.09)                                                                                                           |
| 291.66                 | 4.251         | <b>0.0716</b> | H-5→L (0.04), H-4→L+1 (0.07), H-3→L (0.11), H-2→L+3 (0.10), H-1→L (0.03), H-1→L+2 (0.03), H→L+2 (0.55)                                                               |
| 283.03                 | 4.3806        | 0             | H-5→L+1 (0.07), H-4→L (0.28), H-3→L+1 (0.06), H-3→L+3 (0.03), H-2→L+2 (0.09), H-2→L+4 (0.02), H-1→L+1 (0.07), H→L+3 (0.28)                                           |
| 272                    | 4.5582        | <b>0.3833</b> | H-4→L+1 (0.12), H-3→L (0.51), H-3→L+2 (0.04), H-2→L+1 (0.14), H→L+2 (0.11)                                                                                           |
| 262.51                 | 4.723         | <b>0.0581</b> | H-6→L+1 (0.02), H-5→L (0.23), H-4→L+1 (0.04), H-4→L+3 (0.03), H-3→L+2 (0.04), H-2→L+1 (0.17), H-2→L+3 (0.02), H-1→L+2 (0.08) H→L (0.02), H→L+2 (0.23), H→L+12 (0.03) |
| 257.1                  | 4.8224        | 0             | H-5→L+1 (0.04), H-4→L (0.25), H-3→L+1 (0.03), H-2→L (0.06), H-2→L+2 (0.03), H-1→L+1 (0.43), H→L+3 (0.08)                                                             |
| 256.41                 | 4.8353        | 0             | H-4→L (0.1), H-3→L+1 (0.06), H-2→L (0.03), H-1→L+1 (0.29), H→L+3 (0.45)                                                                                              |

**Table S4.** Electronic transitions obtained by TD-DFT BhandHLYP/6-31 G (d, p) of *E*-PBQT

| $\lambda_{ab}$<br>(nm) | E(tr)<br>(eV) | OS<br>(f) | MO/Character                                                                                                                                                                |
|------------------------|---------------|-----------|-----------------------------------------------------------------------------------------------------------------------------------------------------------------------------|
| 417.62                 | 2.9688        | 3.7759    | H-4→L+1 (0.03), H-2→L (0.05), H-1→L+1 (0.06), H→L (0.81)                                                                                                                    |
| 349.07                 | 3.5519        | 0.007     | H-3→L (0.06), H-2→L+1 (0.02), H-1→L (0.39), H-1→L+2 (0.05), H→L+1 (0.40)                                                                                                    |
| 325.3                  | 3.8114        | 0.2114    | H-3→L+1 (0.06), H-2→L (0.48), H-3→L+2 (0.03), H-2→L (0.25), H-3→L+3 (0.02), H-2→L (0.07)                                                                                    |
| 312.18                 | 3.9716        | 0.014     | H-8→L (0.03), H-3→L (0.03), H-2→L+1 (0.24), H-1→L (0.21), H-1→L+2 (0.03), H→L+1 (0.23), H→L+3 (0.01)                                                                        |
| 300.59                 | 4.1247        | 0.0215    | H-5→L (0.2), H-5→L+2 (0.03), H-4→L (0.33), H-3→L+1 (0.09), H-2→L+2 (0.07), H-1→L+3 (0.06), H→L+4(0.07)                                                                      |
| 297.19                 | 4.1719        | 0.0222    | H-4→L+1 (0.1), H-3→L (0.34), H-3→L+2 (0.02), H-2→L+1 (0.03), H-2→L+3 (0.06), H-1→L (0.07), H-1→L+2 (0.12), H→L+1 (0.13)                                                     |
| 293.98                 | 4.2175        | 0.0909    | H-8→L+1 (0.1), H-7→L (0.17), H-4→L (0.12), H-3→L+1 (0.03), H-3→L+3 (0.06), H-1→L+3 (0.03), H-1→L+5 (0.03), H→L+4 (0.24)                                                     |
| 291.72                 | 4.2501        | 0.0001    | H-8→L (0.13), H-7→L+1 (0.07), H-6→L (0.04), H-4→L+3 (0.03), H-3→L+2 (0.03), H-3→L+4 (0.03), H-1→L(0.09), H-1→L+2(0.05), H-1→L+4(0.06), H→L+1(0.07), H→L+3(0.2), H→L+5(0.05) |
| 282.4                  | 4.3904        | 0.1939    | H-5→L (0.12), H-4→L+2 (0.06), H-3→L+1 (0.13), H-2→L (0.13), H-1→L+1 (0.12), H→L (0.06), H→L+2 (0.18), H→L+4 (0.03)                                                          |
| 282.01                 | 4.3965        | 0.577     | H-5→L (0.27), H-3→L+1 (0.03), H-2→L (0.17), H-2→L+2 (0.08), H-1→L+3 (0.14), H→L+2 (0.07)                                                                                    |

**Table S5.** Electronic transitions obtained by TD-DFT BhandHLYP/6-31 G (d, p) of **EZ-PBQT**

| $\lambda_{ab}$<br>(nm) | E(tr)<br>(eV) | OS<br>(f) | MO/Character                                                                                                                                                             |
|------------------------|---------------|-----------|--------------------------------------------------------------------------------------------------------------------------------------------------------------------------|
| 426.33                 | 2.9082        | 2.5552    | H-2→L (2%)H-1→L(4%),H-1→L+1(3%)H→L(81%)                                                                                                                                  |
| 349.92                 | 3.5432        | 0.6365    | H-3→L (5%)H-2→L(3%),H-2→L+1(3%)H-1→L(33%)H-1→L+2(3%),H→L+1(41%)                                                                                                          |
| 331.35                 | 3.7418        | 0.2530    | H-5→L (2%)H-4→L(10%),H-3→L(3%)H-2→L(49%)H-2→L+1(2%),H-2→L+2(3%),H-1→L+1(15%)H→L+1(3%)H→L+2(4%)                                                                           |
| 317.15                 | 3.9094        | 0.0237    | H-4→L (3%)H-3→L+1(16%),H-1→L(23%)H-1→L+1(6%)H→L(2%),H→L+1(27%),H→L+3(7%)                                                                                                 |
| 310.23                 | 3.9965        | 0.0007    | H-5→L (19%), H-4→L(33%), H-3→L(4%), H-3→L+1(4%), H-2→L(6%), H-2→L+2(8%), H-1→L+1(4%), H-1→L+3(4%), H→L+4(3%)                                                             |
| 299.82                 | 4.1353        | 0.0407    | H-4→L (7%)H-4→L+1(6%),H-3→L(29%)H-3→L+1(2%)H-2→L+1(5%),H-2→L+2(2%),H-2→L+3(4%), H-1→L(4%), H-1→L+2(10%), H-1→L+3(3%), H→L+1(8%)                                          |
| 294.41                 | 4.2112        | 0.0507    | H-8→L (11%)H-8→L+1(3%),H-7→L+1(4%)H-6→L(6%)H-6→L+1(3%),H-5→L(3%),H-4→L(7%), H-4→L+2(3%), H-3→L+3(4%), H-1→L+3(3%), H-1→L+5(2%), H→L+2(2%), H→L+3(3%), H→L+4(22%)         |
| 292.59                 | 4.2374        | 0.0650    | H-8→L (7%)H-7→L(6%),H-6→L(6%)H-6→L+1(6%)H-5→L+1(3%),H-3→L(3%),H-3→L+2(2%), H-3→L+4(4%), H-1→L(5%), H-1→L+2(3%), H-1→L+4(4%), H→L+1(3%), H→L+3(14%), H→L+4(6%), H→L+5(6%) |
| 285.79                 | 4.3382        | 0.3516    | H-5→L (24%)H-4→L+2(2%),H-3→L+1(7%)H-2→L(11%)H-2→L+2(12%),H-1→L+3(12%),H→L+2(3%), H→L+4(4%)                                                                               |
| 284.15                 | 4.3633        | 0.2777    | H-5→L (5%)H-4→L+2(3%),H-3→L+1(14%)H-3→L(17%)H-1→L(2%),H-1→L+1(15%),H→L(5%), H→L+2(13%), H→L+3(5%), H→L+4(2%)                                                             |

**Table S6.** Electronic transitions obtained by TD-DFT BhandHLYP/6-31 G (d, p) of **Z-PBQT**

| $\lambda_{ab}$<br>(nm) | E(tr)<br>(eV) | OS<br>(f) | MO/Character                                                                                                                                                                         |
|------------------------|---------------|-----------|--------------------------------------------------------------------------------------------------------------------------------------------------------------------------------------|
| 433.55                 | 2.8597        | 2.6086    | H-3→L+1 (0.02), H-2→L (0.02), H-1→L+1 (0.03), H→L (0.86)                                                                                                                             |
| 352.47                 | 3.5176        | 0.0076    | H-3→L (0.06), H-2→L+1 (0.04), H-1→L (0.34), H-1→L+2 (0.03), H→L+1 (0.44)                                                                                                             |
| 339.22                 | 3.6549        | 0.4401    | H-5→L (0.04), H-4→L (0.29), H-2→L (0.41), H-1→L+1 (0.14), H→L+2 (0.02)                                                                                                               |
| 323.53                 | 3.8323        | 0.0079    | H-2→L+1 (0.21), H-1→L (0.29), H→L+1 (0.35), H→L+3 (0.07)                                                                                                                             |
| 318.7                  | 3.8903        | 0.07      | H-5→L (0.13), H-4→L (0.35), H-3→L+1 (0.03), H-2→L (0.14), H-2→L+2 (0.07), H-1→L+1 (0.13), H-1→L+3 (0.04), H→L+2 (0.02)                                                               |
| 301.6                  | 4.1109        | 0.0243    | H-6→L (0.02), H-4→L+1 (0.10), H-3→L (0.38), H-2→L+1 (0.05), H-2→L+3 (0.07), H-1→L+2 (0.14), H→L+1 (0.07), H→L+3 (0.02)                                                               |
| 294.84                 | 4.2052        | 0.0632    | H-9→L (0.02), H-8→L+1 (0.09), H-7→L (0.15), H-5→L (0.07), H-4→L (0.05), H-3→L+1 (0.03), H-3→L+3 (0.06), H-1→L+3 (0.02), H-1→L+5 (0.02), H→L+4 (0.26)                                 |
| 293.3                  | 4.2272        | 0.0001    | H-8→L (0.18), H-7→L+1 (0.07), H-5→L+1 (0.05), H-4→L+3 (0.03), H-3→L (0.05), H-3→L+2 (0.05), H-3→L+4 (0.03), H-1→L (0.04), H-1→L+2 (0.02), H-1→L+4 (0.05), H→L+3 (0.21), H→L+5 (0.06) |
| 287.95                 | 4.3058        | 0.3897    | H-5→L (0.23), H-4→L+2 (0.03), H-3→L+1 (0.09), H-2→L (0.09), H-2→L+2 (0.11), H-1→L+3 (0.16), H→L+2 (0.03), H→L+4 (0.05)                                                               |
| 285                    | 4.3504        | 0.5477    | H-7→L (0.02), H-5→L (0.04), H-4→L+2 (0.03), H-3→L+1 (0.12), H-2→L (0.21), H-2→L+2 (0.03), H-1→L+1 (0.15), H→L (0.04), H→L+2 (0.16), H→L+4 (0.06)                                     |

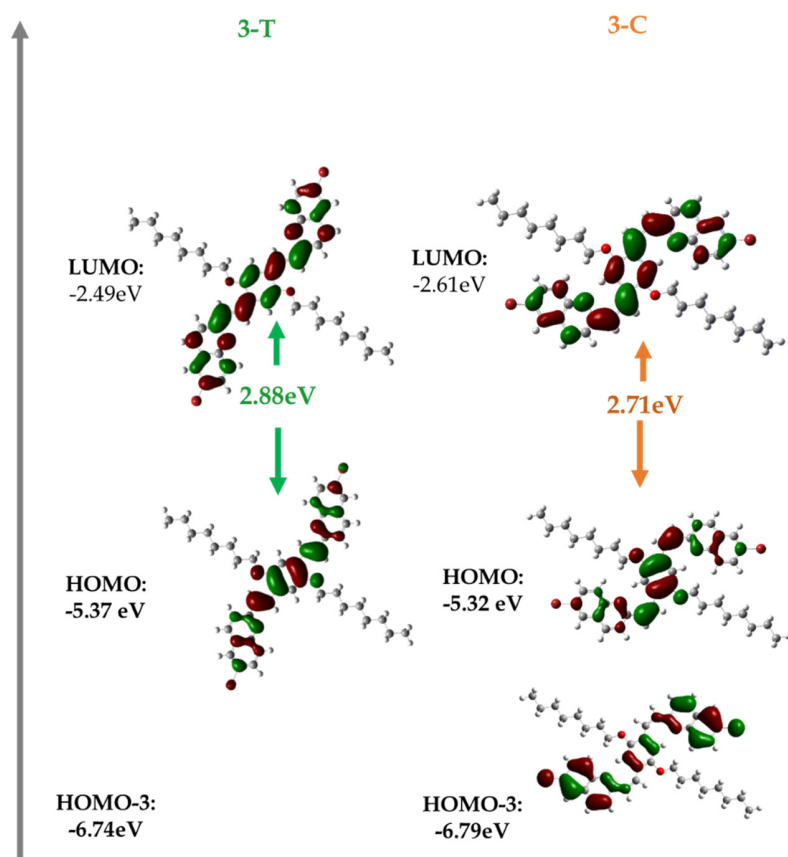

**Figure S2.** Isoimages of the molecular orbitals of trimer **3**.



**Table S7.** Electronic transition data obtained by the BhandHLYP/6-31G (d, p) calculation for **3T** and **3C**.

| 3T                     |               |           |                                                    | 3C                     |               |           |                                                     |
|------------------------|---------------|-----------|----------------------------------------------------|------------------------|---------------|-----------|-----------------------------------------------------|
| $\lambda_{ab}$<br>(nm) | E(tr)<br>(eV) | OS<br>(f) | MO/Character                                       | $\lambda_{ab}$<br>(nm) | E(tr)<br>(eV) | OS<br>(f) | MO/Character                                        |
| 402.19                 | 3.0827        | 2.1225    | H→L (0.92)                                         | 422.3                  | 2.9359        | 1.4219    | H→L (0.94)                                          |
| 305.71                 | 4.0556        | 0.1116    | H-2→L (0.73)                                       | 332.47                 | 3.7292        | 0.1162    | H-1→L (0.87)                                        |
| 289.34                 | 4.285         | 0.1352    | H-2→L+2 (0.04),<br>H-1→L+3 (0.11),<br>H→L+2 (0.43) | 291.66                 | 4.251         | 0.0716    | H-3→L (0.11),<br>H-2→L+3 (0.10)<br>H→L+2 (0.55)     |
| 270.71                 | 4.58          | 0.4229    | H-4→L+1 (0.12),<br>H-3→L (0.47),<br>H-1→L+1 (0.19) | 272                    | 4.5582        | 0.3833    | H-4→L+1 (0.12),<br>H-3→L (0.51),<br>H-2→L+1 (0.14), |
| 252.97                 | 4.9012        | 0.1054    | H-5→L (0.20),<br>H-1→L+1 (0.13),<br>H→L+2 (0.32)   | 262.51                 | 4.723         | 0.0581    | H-5→L (0.23),<br>H-2→L+1 (0.17),<br>H→L+2 (0.23)    |

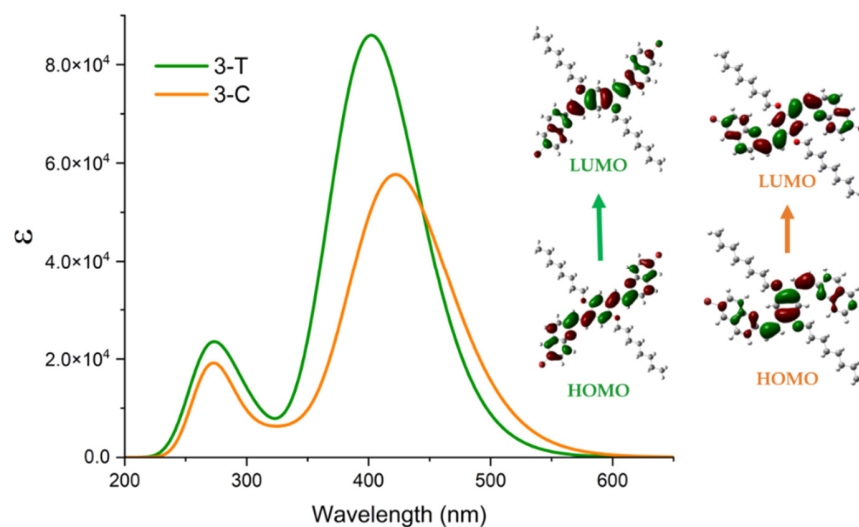

**Figure S3.** TDDFT absorption spectra of macromolecule **3** (3-C, 3-T) obtained by applying the BHandHLYP / 6-31 (d, p) methode. At right, Frontier molecular orbitals of **3** in its *cis* (3-C) and *trans* (3-T) conformation.

#### 4. Additional voltammograms

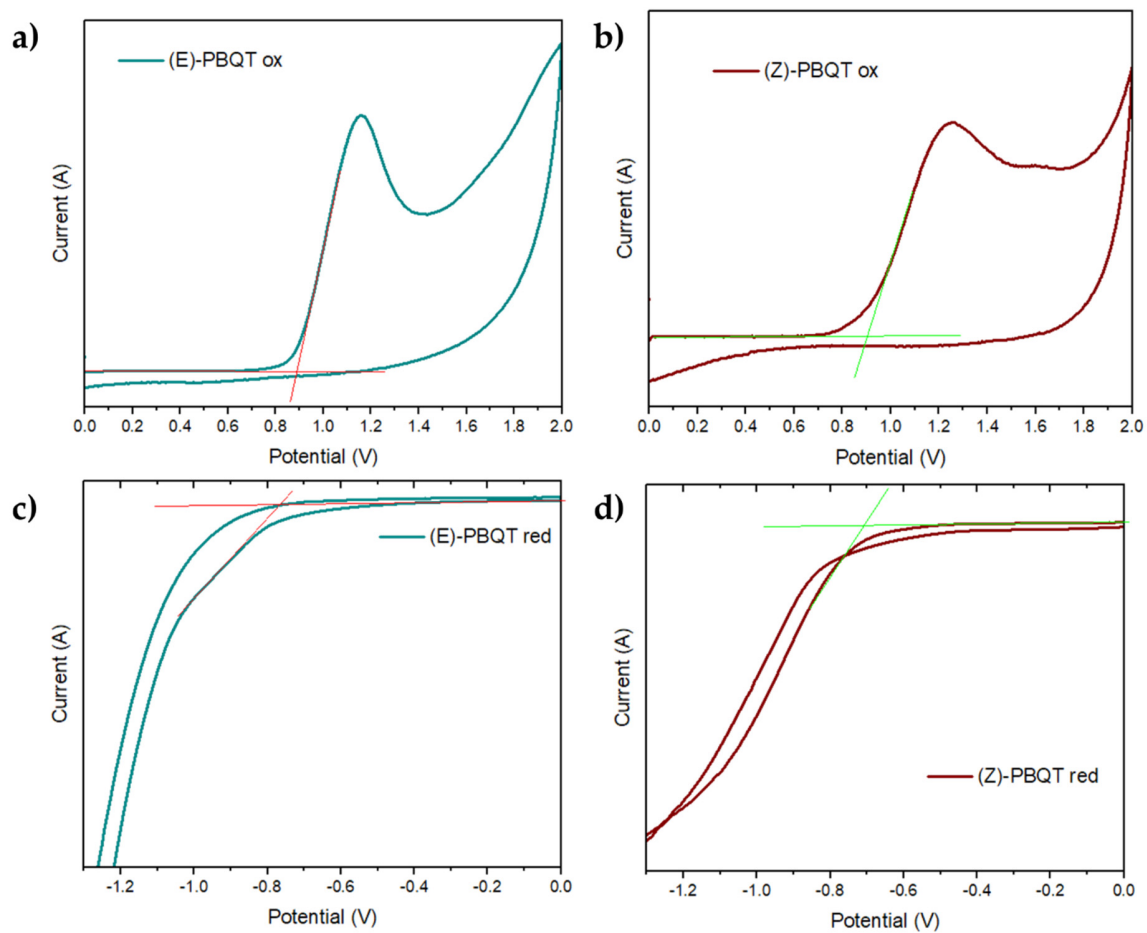

**Figure S4.** Voltammogram of PBQT vs Ag/AgCl. a) Cathodic region for E-PBQT, b) Cathodic region for Z-PBQT, c) anodic region for E-PBQT d) anodic region for Z-PBQT.
